# Supplementary material for: miRNA in Molecular Diagnostics
Source: MDPI journal article supplement (doi:10.3390/bioengineering9090459), 2022-09-09
Supplement: s1 [file s1]

**Table S1.** Examples of the most investigated miRNAs in various tumors.

| Type of tissue/tumor                                                 | miRNA                                                      | The role of miRNA                                                                                                                                                             | Genes and pathways                                                                    | References   |
|----------------------------------------------------------------------|------------------------------------------------------------|-------------------------------------------------------------------------------------------------------------------------------------------------------------------------------|---------------------------------------------------------------------------------------|--------------|
| Chronic lymphocytic leukemia,<br>Acute myeloid leukemia              | miR15a, miR16                                              | suppressor,<br>apoptosis,<br>proliferation                                                                                                                                    | suppression of<br>antiapoptotic BCL2 and<br>MCL1,<br>cyclin D1                        | [28–31]      |
| B cell lymphomas,<br>B cell leukemia                                 | miR17-92 cluster:<br>miR17, 18a, 19a, 20a,<br>19b-1, 92a-1 | Oncomir,<br>apoptosis,<br>proliferation,<br>survival,<br>resistance to<br>chemotherapy,<br>BCR signaling                                                                      | BIM, PTEN, p21 p57,<br>CD22, PHLPP2, FCGR2B,<br>ITIM, Bcl2<br>NFKappaB, PI3K pathways | [32–36]      |
| B cell lymphoma,<br>Chronic lymphocytic leukemia,<br>pro/pre-B cells | miR34a                                                     | suppressor,<br>apoptosis,<br>proliferation                                                                                                                                    | FOXP1, ZAP-70, BXL2,<br>BCL6, B MYB, CDK6 and<br>AXL                                  | [37]         |
| Mature B cells,<br>mononuclear cells                                 | miR150                                                     | survival, BCR<br>signaling,<br>immortality,<br>migration                                                                                                                      | Myb, FOXP1, CXCR4,<br>pathway PIK3AP1, AKT2                                           | [26, 38, 39] |
| B cell<br>lymphoma and leukemia                                      | miR155                                                     | oncomir and<br>suppressor,<br>BCR activation,<br>immunoglobulin<br>somatic<br>hypermutation,<br>survival,<br>proliferation, motility,<br>modulation of TGF $\beta$<br>pathway | Pu.1 AID,<br>SHiP-1, c/EBP $\beta$ , HGAL,<br>RTKN2, SOCS, SHANK2                     | [40, 41]     |
| Chronic lymphocytic leukemia                                         | miR181b                                                    | suppressor,<br>apoptosis, survival                                                                                                                                            | Bcl2, MCL1, TCL1                                                                      | [42, 43]     |
| Lymphoma                                                             | miR21                                                      | oncomir,<br>survival and<br>chemotherapy<br>resistance,<br>proliferation,<br>apoptosis, DNA<br>repair                                                                         | PTEN, PDCD4,<br>hMSH2                                                                 | [44, 45]     |
| Lymphoma, Chronic<br>lymphocytic leukemia                            | miR29a/b, c                                                | suppressor,<br>proliferation,<br>apoptosis                                                                                                                                    | CDK6, TCL1, MCL1                                                                      | [26, 46]     |
| Glioblastoma                                                         | miR21, miR338,<br>miR485, miR491 and<br>miR1290            | apoptosis,<br>proliferation                                                                                                                                                   | MAPK, PI3K/Akt, mTOR<br>and Wnt signaling<br>pathways                                 | [47]         |
| Glioblastoma                                                         | miR7                                                       | suppressor survival,<br>proliferation,<br>inhibition of<br>apoptosis                                                                                                          | Akt MAP kinase pathways                                                               | [48]         |
| Glioblastoma                                                         | miR21                                                      | oncomir,                                                                                                                                                                      | PI3K-Akt pathway,                                                                     | [49–51]      |

|                                                  |                |                                                                                                                                      |                                                                  |              |
|--------------------------------------------------|----------------|--------------------------------------------------------------------------------------------------------------------------------------|------------------------------------------------------------------|--------------|
|                                                  |                | apoptosis,<br>proliferation                                                                                                          | PTEN, PDCD4,<br>PDGF signaling                                   |              |
| Glioblastoma                                     | miR451         | migration, resistance<br>to chemotherapy,<br>survival                                                                                | CAB39, AMPK pathway                                              | [52, 53]     |
| Glioblastoma                                     | miR326         | survival                                                                                                                             | Notch, PKM2                                                      | [54]         |
| Glioblastoma                                     | miR34a         | proliferation,<br>survival, migration,<br>stemness, invasion                                                                         | c-Met, Notch, CDK6, Akt<br>and Wnt pathways                      | [55]         |
| Glioblastoma                                     | miR128         | proliferation, self-<br>renewal,<br>stem cell<br>maintenance,<br>radioresistance                                                     | p53, RTK, Bmi-1,<br>SUZ12 (PRC1 complex)                         | [56–58]      |
| Glioblastoma                                     | miR181         | apoptosis,<br>epithelial-<br>mesenchymal<br>transition                                                                               | Bcl2, KPN4                                                       | [56, 59–61]  |
| Glioblastoma                                     | miR221, miR222 | proliferation,<br>DNA repair                                                                                                         | p27, p57, MGMT                                                   | [56, 59, 62] |
| Lung carcinoma,<br>small cell lung carcinoma     | miR21          | apoptosis,<br>proliferation                                                                                                          | PTEN in PI3K/Akt<br>pathways, TGF $\beta$<br>pathway/SMAD7       | [63, 64]     |
| Small cell lung carcinoma                        | miR205         | survival, proliferation<br>migration                                                                                                 | PHLPP2 in Akt signaling<br>integrin $\alpha$ 5                   | [65–67]      |
| Small cell lung carcinoma                        | let-7          | proliferation, cell<br>cycle                                                                                                         | Ras Myc pathways                                                 | [68, 69]     |
| Lung carcinoma, non-small cell<br>lung carcinoma | miR30          | suppressor,<br>apoptosis,<br>survival,<br>migration,<br>epithelial-<br>mesenchymal<br>transition, resistance<br>to chemotherapeutics | PI3K/Akt pathway<br>p53,<br>epithelial-mesenchymal<br>transition | [70, 71]     |
| Lung carcinoma                                   | miR26          | autophagy,<br>apoptosis                                                                                                              | TGF $\beta$ JNK signaling                                        | [72]         |
| Lung carcinoma                                   | miR145         | stemness, migration                                                                                                                  | epithelial-mesenchymal<br>transition                             | [73]         |
| Lung carcinoma                                   | miR421         | lipid metabolism                                                                                                                     | PTEN,<br>PI3K/Akt/mTOR pathway<br>signaling                      | [74]         |
| Lung carcinoma                                   | miR214         | resistance to<br>chemotherapy,<br>angiogenesis,<br>glycolysis, metastasis                                                            | PTEN/Akt/mTOR, PKM2,<br>HK2, ING4, TWIST,<br>HIF/VEGF pathways   | [75, 76]     |
| Non-small cell lung carcinoma                    | miR148a        | apoptosis, epithelial-<br>mesenchymal<br>transition, invasion                                                                        | MMP15, ROCK1                                                     | [77]         |
| Non-small cell lung carcinoma                    | miR92a         | invasiveness                                                                                                                         | RECK                                                             | [78, 79]     |

|                   |                                                    |                                                     |                                                    |          |
|-------------------|----------------------------------------------------|-----------------------------------------------------|----------------------------------------------------|----------|
| Breast carcinoma  | miR125a                                            | proliferation, drug sensitivity, autophagy          | EGFR signaling, LIF receptor, Hippo signaling      | [80, 81] |
| Breast carcinoma  | miR145, miR21, miR155, miR205, miR125b             | expression set                                      |                                                    | [82]     |
| Breast carcinoma  | miR205                                             | proliferation, invasion                             | cdk2, cdk4, HMBG                                   | [83, 84] |
| Breast carcinoma  | miR153                                             | angiogenesis                                        | HIF/VEGFA pathway                                  | [85]     |
| Breast carcinoma  | miR214                                             | oncomir, suppressor, resistance to therapy invasion | resistance to chemotherapy, p53                    | [86, 87] |
| Breast carcinoma  | miR21                                              | apoptosis                                           | PDCD4                                              | [88]     |
| Breast carcinoma  | miR10b                                             | metastasis                                          | Twist-RHOC pathway                                 | [89]     |
| Breast carcinoma  | let7                                               | self-renewal, differentiation                       | Ras pathway, HMGA2                                 | [90]     |
| Breast carcinoma  | miR210                                             | hypoxia-dependent processes                         | HIF1                                               | [91]     |
| Breast carcinoma  | miR205                                             | proliferation, invasion, resistance to chemotherapy | HMGB3, VEGFA, FGF2                                 | [84, 92] |
| Breast carcinoma  | miR7                                               | proliferation, apoptosis                            | Akt pathway                                        | [93]     |
| Bladder carcinoma | miR373                                             | proliferation, migration and invasion               | E cadherin, EGFR                                   | [94, 95] |
| Bladder carcinoma | miR21, miR34a, miR222                              | cancer progression                                  |                                                    | [96–98]  |
| Bladder carcinoma | miR223, 26b, 221, 103, 185, 23b, 203, 17, 23a, 205 | upregulation                                        |                                                    | [99]     |
| Bladder carcinoma | miR135                                             | invasion                                            | wnt/ $\beta$ -catenin pathway                      | [100]    |
| Bladder carcinoma | miR31                                              | chemotherapy resistance                             | integrin $\alpha$ 5                                | [101]    |
| Bladder carcinoma | miR200c, miR141, miR30b                            | set for invasive bladder tumor phenotype            |                                                    | [98]     |
| Renal carcinoma   | miR28, miR185, miR27, let7                         | upregulation                                        |                                                    | [99]     |
| Renal carcinoma   | miR21                                              | proliferation                                       | PTEN, mTOR signaling                               | [102]    |
| Renal carcinoma   | miR182                                             | proliferation                                       | Akt/FOXO3 signaling                                | [103]    |
| Renal carcinoma   | miR195                                             | proliferation                                       | VEGFR2, Pi3K/Akt pathway                           | [104]    |
| Renal carcinoma   | miR138                                             | migration                                           | SOX4, epithelial-mesenchymal transition, migration | [105]    |
| Renal carcinoma   | miR106b                                            | proliferation                                       | Wnt/ $\beta$ -catenin signaling                    | [106]    |
| Renal carcinoma   | miR203                                             | proliferation, migration, apoptosis                 | GSK3 $\beta$                                       | [107]    |

|                          |                                                          |                                                                                  |                                                            |                |
|--------------------------|----------------------------------------------------------|----------------------------------------------------------------------------------|------------------------------------------------------------|----------------|
| Colorectal carcinoma     | miR101                                                   | proliferation                                                                    | COX2, Wnt/ $\beta$ -catenin                                | [108]          |
| Colorectal carcinoma     | miR141                                                   | proliferation                                                                    | MAP kinase pathway                                         | [109]          |
| Colorectal carcinoma     | miR200c                                                  | proliferation,<br>migration                                                      | Wnt/ $\beta$ -catenin                                      | [110]          |
| Colorectal carcinoma     | miR21                                                    | cell cycle progression,<br>migration, invasion,<br>resistance to<br>chemotherapy | cdc25, hMSH2<br>TGF $\beta$ pathway                        | [45, 111, 112] |
| Colorectal carcinoma     | miR362                                                   | cell cycle arrest                                                                | E2F1, USF2, PTPN1                                          | [113]          |
| Colorectal carcinoma     | miR145                                                   | proliferation,<br>migration, invasion                                            | PAK4                                                       | [114]          |
| Colorectal carcinoma     | miR181                                                   | proliferation                                                                    | NF $\kappa$ B signaling                                    | [115]          |
| Colorectal carcinoma     | miR148b                                                  | proliferation,<br>migration, invasion                                            | Rock                                                       | [116]          |
| Hepatocellular carcinoma | miR132                                                   | proliferation and<br>apoptosis                                                   | PI3K/Akt PIK3R3                                            | [117]          |
| Hepatocellular carcinoma | miR194                                                   | invasion, migration,<br>inflammation                                             | NF $\kappa$ B pathway                                      | [118]          |
| Hepatocellular carcinoma | miR101                                                   | glucose metabolism                                                               | glycogen metabolism,<br>PYGB                               | [119]          |
| Hepatocellular carcinoma | miR485                                                   | migration, invasion                                                              | STAT3                                                      | [120]          |
| Hepatocellular carcinoma | miR224                                                   | apoptosis                                                                        | API5                                                       | [121]          |
| Hepatocellular carcinoma | miR17-92, miR21                                          | proliferation,<br>anchorage,<br>independent growth                               |                                                            | [122]          |
| Hepatocellular carcinoma | miR125                                                   | proliferation                                                                    | Pokemon                                                    | [123, 124]     |
| Hepatocellular carcinoma | miR18, 224                                               | expression set                                                                   |                                                            | [125]          |
| Gastric carcinoma        | miR214                                                   | proliferation,<br>migration, invasion                                            | PTEN                                                       | [126]          |
| Gastric carcinoma        | miR101                                                   | migration                                                                        | EZH2                                                       | [127]          |
| Gastric carcinoma        | miR370                                                   | proliferation                                                                    | EGFR                                                       | [128]          |
| Gastric carcinoma        | miR138, miR204                                           | proliferation,<br>migration                                                      | EGFR                                                       | [129]          |
| Gastric carcinoma        | miR146a                                                  | proliferation,<br>migration                                                      |                                                            | [130]          |
| Gastric carcinoma        | miR223, 106b, 147,<br>34a, 18a, 17, 98, 185,<br>638, 378 | set of deregulated<br>RNA                                                        |                                                            | [131]          |
| Gastric carcinoma        | miR21                                                    | apoptosis                                                                        | PDCD4                                                      | [132]          |
| Gastric carcinoma        | miR383                                                   | apoptosis                                                                        | Bcl2                                                       | [133]          |
| Gastric carcinoma        | miR135b                                                  | proliferation,<br>chemotherapy<br>resistance                                     | MAPK pathways                                              | [134]          |
| Pancreatic carcinoma     | miR202                                                   | apoptosis, migration                                                             | TGF $\beta$ pathway, epithelial-<br>mesenchymal transition | [135]          |
| Pancreatic carcinoma     | miR367                                                   | migration, invasion                                                              | TGF $\beta$ pathway, epithelial-<br>mesenchymal transition | [136]          |
| Cervical carcinoma       | miR18a                                                   | proliferation                                                                    | Hippo signaling                                            | [137]          |

|                                                        |                           |                                                                        |                                                        |                    |
|--------------------------------------------------------|---------------------------|------------------------------------------------------------------------|--------------------------------------------------------|--------------------|
| Cervical carcinoma                                     | miR375                    | apoptosis,<br>proliferation,<br>chemoresistance                        | E cadherin                                             | [138]              |
| Cervical carcinoma                                     | miR9                      | angiogenesis,<br>migration                                             |                                                        | [139]              |
| Cervical carcinoma                                     | miR21                     | chemotherapy<br>resistance                                             | PTEN/Akt/HIF1,<br>Akt/mTor pathway                     | [140]              |
| Cervical carcinoma                                     | miR138                    | proliferation,<br>metastasis, epithelial-<br>mesenchymal<br>transition | EZH2                                                   | [141]              |
| Prostate cancer                                        | miR141                    | proliferation,<br>migration, apoptosis                                 | RUNX1                                                  | [142, 143]         |
| Prostate cancer                                        | miR182                    | invasion, proliferation                                                | FOXF2, RECK, MTSS1                                     | [144]              |
| Prostate cancer                                        | miR143, miR145            | metastasis, apoptosis,<br>proliferation,<br>migration, invasion        | epithelial-mesenchymal<br>transition, PLD5             | [145, 146]         |
| Prostate cancer                                        | miR205, miR31             | resistance to<br>chemotherapy                                          | apoptosis                                              | [147]              |
| Prostate cancer                                        | miR221, miR222            | proliferation                                                          | p27Kip1                                                | [148]              |
| Prostate cancer                                        | let7                      | chromatin<br>modulation,<br>growth, self-renewal                       | HMGA, androgen receptor<br>signaling                   | [149]              |
| Prostate cancer                                        | miR21                     | apoptosis, invasion,<br>angiogenesis                                   | MARCKS, HIF and VEGF<br>pathways, Akt MAPK<br>pathways | [150, 151]         |
| Testicular tumor: testicular germ<br>cell tumor        | miR371, miR372,<br>miR373 | cell cycle regulation,<br>senescence                                   | p53 pathway                                            | [152–154]          |
| Testicular germ cell tumor                             | miR223                    | apoptosis, cell growth                                                 | FBXW7                                                  | [155]              |
| Testicular germ cell tumor                             | miR383                    | sensitivity to DNA<br>damage                                           | PNUTS                                                  | [156]              |
| Testicular germ cell tumor                             | miR302                    | proliferation,<br>invasion, apoptosis                                  | MAPK PI3K/Akt signaling                                | [152, 157,<br>158] |
| Testicular tumor: seminomas and<br>embryonal carcinoma | miR514a                   | apoptosis                                                              | NFκB, p53, Wnt pathways,<br>apoptosis                  | [159]              |
| Testicular tumor                                       | miR199a                   | metabolism,<br>gene expression                                         | DNMT3, aerobic glycolysis                              | [160]              |
| Skin tumor: melanoma                                   | miR140                    | proliferation, invasion                                                | WNT, NFκB signaling,<br>SOX4                           | [161]              |
| Melanoma                                               | miR137                    |                                                                        | MITF, cell survival,<br>chromatin remodulation         | [162]              |
| Melanoma                                               | miR182                    | cell growth,<br>migration, invasion                                    | MITF, BCL2, cyclin D, Akt<br>ERK pathways              | [163]              |
| Melanoma                                               | miR148, miR137            | proliferation                                                          | MITF                                                   | [164]              |
| Melanoma                                               | miR211                    | invasion, migration                                                    | AP1S2, SOX11, IGFBP5,<br>SERINC3                       | [165]              |
| Melanoma                                               | miR7                      | proliferation,<br>apoptosis                                            | EGFR/IGF, PI3K/Akt<br>signaling                        | [166]              |
| Melanoma                                               | miR211, miR221,<br>miR10a | melanoma signature                                                     |                                                        | [167]              |

|                                                |                                                         |                                                            |                                                        |            |
|------------------------------------------------|---------------------------------------------------------|------------------------------------------------------------|--------------------------------------------------------|------------|
| Melanoma                                       | miR155                                                  | immune surveillance                                        | MITF                                                   | [168]      |
| Melanoma                                       | miR200c, 23b, 205, 146a, 155                            | melanoma signature                                         |                                                        | [169]      |
| Skin tumor: cutaneous squamous cell carcinoma  | miR125b                                                 | proliferation, invasion, migration                         | MMP13                                                  | [170]      |
| Cutaneous squamous cell carcinoma              | miR204                                                  | proliferation                                              | MAPK, STAT3                                            | [171]      |
| Cutaneous squamous cell carcinoma              | miR181a                                                 | proliferation                                              | KRAS                                                   | [172]      |
| Cutaneous squamous cell carcinoma              | miR142                                                  | proliferation, stem-like properties                        | PTEN                                                   | [173]      |
| Cutaneous squamous cell carcinoma              | miR221                                                  | proliferation                                              | PTEN                                                   | [174]      |
| Cutaneous squamous cell carcinoma              | miR203                                                  | proliferation, motility, angiogenesis                      | c-Myc                                                  | [175]      |
| Cutaneous squamous cell carcinoma              | miR148a                                                 | proliferation                                              | MAP kinase pathway                                     | [176]      |
| Cutaneous squamous cell carcinoma              | miR199a                                                 | proliferation, migration                                   | CD44, metalloprotease activity                         | [177]      |
| Cutaneous squamous cell carcinoma              | miR124/214                                              | proliferation                                              | ERK pathways                                           | [178]      |
| Thyroid carcinoma: thyroid papillary carcinoma | miR21, miR222, miR181b, miR146                          | proliferation, cell cycle                                  | p27                                                    | [179–181]  |
| Thyroid carcinoma                              | miR187, miR221, miR222, miR146b, miR155, miR224, miR197 | thyroid tumor profile                                      |                                                        | [182]      |
| Thyroid carcinoma                              | miR146                                                  | progression, proliferation, chemoresistance                | KIT, RARB                                              | [183, 184] |
| Thyroid carcinoma                              | miR30, miR200                                           | proliferation, invasion, epithelial-mesenchymal transition | TGF $\beta$ pathway, epithelial-mesenchymal transition | [185, 186] |
| Thyroid carcinoma                              | miR145                                                  | migration, invasion                                        | NF $\kappa$ B                                          | [187]      |
| Thyroid carcinoma: medullary thyroid carcinoma | miR10a, miR375                                          | cell growth                                                | YAP SLC16a2                                            | [188]      |
| Medullary thyroid carcinoma                    | miR183, miR375, miR9                                    | profile                                                    |                                                        | [189]      |
| Medullary thyroid carcinoma                    | miR21                                                   | tumor progression                                          | PDCD4                                                  | [190]      |
| Osteosarcoma                                   | miR17/92, miR20a                                        | proliferation, migration                                   | B-catenin pathways, PTEN                               | [191]      |
| Osteosarcoma                                   | miR100, 125b, 22, 221/222, 27a, 29a                     | proliferation                                              | IGF signaling                                          | [192]      |
| Osteosarcoma                                   | miR192                                                  | proliferation, migration, apoptosis, invasion              | TCF7                                                   | [193]      |
| Osteosarcoma                                   | miR23a                                                  | differentiation, proliferation                             | connexin 43, RUNX, CXCL12                              | [194, 195] |

**Table S2.** Host miRNAs in Herpesviridae infection.

| Virus | miRNA                                   | Target                                 | Regulation of target expression | Role                                                                                                     | References           |       |
|-------|-----------------------------------------|----------------------------------------|---------------------------------|----------------------------------------------------------------------------------------------------------|----------------------|-------|
| HSV-1 | miR101                                  | ATP5B                                  | Downregulated                   | ATP5B depletion and blockage of HSV-1 DNA packaging and capsid maturation                                | [224]                |       |
|       |                                         | GRSF1                                  | Downregulated                   | Binds to viral p40 mRNA, enhances its expression, and supports viral replication                         | [224]                |       |
|       | miR138                                  | ICPO                                   | Downregulated                   | Binds directly to its target and promotes viral latency                                                  | [224, 228]           |       |
|       | miR23                                   | IRF1                                   | Downregulated                   | Helps virus to avoid host immune system by damaging interferon pathways                                  | [224]                |       |
|       | miR132                                  | P300                                   | Downregulated                   | Innate immune evasion                                                                                    | [224, 229]           |       |
| HCMV  | miR200 family                           | ULI122                                 | Downregulated                   | Inhibition of viral reactivation                                                                         | [224, 230]           |       |
|       | miR132                                  | P300                                   | Downregulated                   | Innate immune evasion                                                                                    | [224, 229]           |       |
| EBV   | EBNA1 protein upregulates Let-7a family |                                        | Dicer                           | Downregulated                                                                                            | Promotes EBV latency | [231] |
|       | miR424                                  | tumor suppressor gene SIAH1            | Downregulated                   | Helps infected cells to avoid apoptosis                                                                  | [224, 232]           |       |
|       | miRN17-92 cluster                       | PTEN and the pro-apoptotic protein Bim | Downregulated                   | Inhibits cellular differentiation and function, thus helping EBV escape host immune system               | [233]                |       |
| KSHV  | miR608 and miR1293                      | vIL-6 and hIL-6                        | Downregulated                   | Evades host immune system by suppressing translation of vIL-6 and hIL-6                                  | [224, 234]           |       |
|       | miR31                                   | FAT4                                   | Downregulated                   | Directly represses tumor suppressor and inhibitor of migration whose reduction enhances endothelial cell | [224, 235]           |       |

mobility, leading to viral dissemination and angiogenesis

**Table S3.** Viral miRNAs in Herpesviridae infection.

| <b>Virus</b> | <b>miRNA</b>                      | <b>Target</b> | <b>Regulation of target expression</b> | <b>Role</b>                                                                                                                                                                                                        | <b>References</b> |
|--------------|-----------------------------------|---------------|----------------------------------------|--------------------------------------------------------------------------------------------------------------------------------------------------------------------------------------------------------------------|-------------------|
| HSV-1        | v-miRH6                           | ICP4          | Downregulated                          | Leads to HSV-1 latency or suppression of viral production in infected cells                                                                                                                                        | [236]             |
|              | v-miRNAH2                         | ICP0          | Downregulated                          | Enhances latency of viral infection, increasing the amount of virus to be reactivated later during infection                                                                                                       | [237]             |
| HCMV         | v-miRUL112                        | MICB          | Downregulated                          | Makes the infected cells unrecognizable to NK cells and CD8 T cells                                                                                                                                                | [224, 228]        |
|              | v-miRUL112-3p                     | TLR2          | Downregulated                          | Significant for viral persistence as it prevents NFκB-mediated proinflammatory response                                                                                                                            | [238]             |
| EBV          | v-miBART2-5p                      | MICB          | Downregulated                          | Makes the infected cells unrecognizable to NK cells and CD8 T cells                                                                                                                                                | [233]             |
|              | v-miRBART1-35 and v-miRBHRF1-2-3p | IL-12B        | Downregulated                          | Levels of IL-12 in infected B cells are decreased, leading to disruption of differentiation of CD4 T cells into T helper 1 cells and causing a reduction in cytotoxic T cells specific for resolving EBV infection | [233]             |
| KSHV         | v- miRK12-7                       | MICB          | Downregulated                          | Makes the infected cells unrecognizable to NK cells and CD8 T cells                                                                                                                                                | [228]             |



|  |                                                                    |         |               |                                                                                           |            |
|--|--------------------------------------------------------------------|---------|---------------|-------------------------------------------------------------------------------------------|------------|
|  | v-miRK10a                                                          | TWEAKER | Downregulated | Reduces production of proinflammatory cytokines IL-8 and monocyte chemoattractant protein | [228, 238] |
|  | v-miR (indirect effect), v-miRK12-7 and v-miRK12-9 (direct effect) | RTA     | Downregulated | Leads to a prolonged latent phase of viral infection                                      | [224, 228] |

**Table S4.** Host miRNAs in polyomaviruses infection.

| Virus | miRNA          | Target                                                                        | Regulation of target expression | Role                                                                                                                             | References |
|-------|----------------|-------------------------------------------------------------------------------|---------------------------------|----------------------------------------------------------------------------------------------------------------------------------|------------|
| BKV   | miR10<br>miR30 | P53, bcl2-related protein A1, high temperature requirement protein A1 (HTRA1) | Unknown                         | Regulation of expression of genes involved in evading host immune response, preventing apoptosis and inducing inflammation       | [239]      |
| SV40  | miR27a         | IL-10                                                                         | Upregulated                     | Enhances expression of proinflammatory cytokines in TLR2/4 activated macrophages that results in dysregulation of the cell cycle | [224]      |

**Table S5.** Viral miRNAs in polyomaviruses infection.

| Virus | miRNA                        | Target                              | Regulation of target expression | Role                                                                                                                                                           | References |
|-------|------------------------------|-------------------------------------|---------------------------------|----------------------------------------------------------------------------------------------------------------------------------------------------------------|------------|
| BKV   | BKV-miRB1-5p<br>BKV-miRB1-3p | Large T antigen (LTA <sub>g</sub> ) | Upregulated                     | Inhibition of LTA <sub>g</sub> expression, leading to prevention of viral replication and inability of cytotoxic T lymphocytes to recognize BKV-infected cells | [224, 239] |
| JCV   | v-miRJ1-5p and v-miRJ1-3p    | Large T antigen (LTA <sub>g</sub> ) | Upregulated                     | Inhibition of LTA <sub>g</sub> expression, leading to                                                                                                          | [224, 228] |

prevention of viral replication and inability of cytotoxic T lymphocytes to recognize BKV-infected cells

**Table S6.** Host miRNAs in papillomavirus infection.

| Virus       | miRNA   | Target                                                     | Regulation of target expression | Role                                                                                                                              | References |
|-------------|---------|------------------------------------------------------------|---------------------------------|-----------------------------------------------------------------------------------------------------------------------------------|------------|
| HPV16/HPV18 | Let-7   | Signal transducer and activator of transcription 3 (STAT3) | Downregulated                   | Overexpression of STAT3 results in increased inflammatory response                                                                | [240]      |
|             | miR125s | STAT3                                                      | Downregulated                   | Elevated matrix metalloproteinase 2 and 9 (MMP-2 and MMP9) leads to proinflammatory and anti-inflammatory impact during infection | [240]      |

**Table S7.** Host miRNAs in adenoviruses infection.

| Virus | miRNA                                         | Target                                                                                                 | Regulation of target expression | Role                                                                          | References |
|-------|-----------------------------------------------|--------------------------------------------------------------------------------------------------------|---------------------------------|-------------------------------------------------------------------------------|------------|
|       | VA RNA1                                       | Protein double-stranded RNA-activated kinase (PKR)                                                     | Upregulated                     | Inactivates PKR, causing the inhibition of innate immune response             | [241]      |
|       | mivaRNAI-137<br>mivaRNAI-138<br>mivaRNAII-138 | Protein lymphocyte antigen 6 complex, Locus K (Ly6K), T-Cell-Restricted Intracellular Antigen-1 (TIA1) | Upregulated                     | Regulates cell growth and switching between early and late stage of infection | [226, 241] |

**Table S8.** Host miRNAs in hepadnaviridae infection.

| Virus | miRNA  | Target                                                                               | Regulation of target expression | Role                                                                                                                                                            | References |
|-------|--------|--------------------------------------------------------------------------------------|---------------------------------|-----------------------------------------------------------------------------------------------------------------------------------------------------------------|------------|
| HBV   | miR181 | IL1-a                                                                                | Upregulated                     | Has anti-inflammatory effect by inhibiting expression of IL1-a                                                                                                  | [242]      |
|       | miR155 | Suppressor of cytokine signaling 1 (SOCS1)<br>CCAAT/enhancer binding protein (C/EBP) | Upregulated                     | Controls differentiation of T cells and is essential for normal B cell differentiation, leading to overactivation of immune system and impaired immune response | [242]      |

**Table S9.** Viral miRNAs in hepadnaviridae infection.

| Virus | miRNA  | Target                            | Regulation of target expression | Role                                                                                                      | References |
|-------|--------|-----------------------------------|---------------------------------|-----------------------------------------------------------------------------------------------------------|------------|
| HBV   | v-miR2 | Ras-related nuclear protein (RAN) | Unknown                         | Regulation of RAN expression in other tissues correlates with cell proliferation, migration, and invasion | [226, 242] |
|       | v-miR3 | Unknown                           | Unknown                         | Correlates with HBV activity and enhances interferon (IFN) production                                     | [242]      |

**Table S10.** Host miRNAs in RNA virus infection.

| Virus                     | miRNA  | Target                                     | Regulation of target expression | Role                                                                                                                                | References |
|---------------------------|--------|--------------------------------------------|---------------------------------|-------------------------------------------------------------------------------------------------------------------------------------|------------|
| HCV ( <i>Flaviridae</i> ) | miR122 | Exoribonuclease 2 (XRN2)                   | Downregulated                   | Needed for HCV replication, inhibits the interaction between XRN2 and HCV 5'UTR, protects the viral genome from degradation by XRN2 | [242]      |
|                           | miR155 | Suppressor of cytokine signaling 1 (SOCS1) | Upregulated                     | Controls differentiation of T cells and is essential for normal B cell                                                              | [242, 243] |

|                         |                   |                                                     |               |                                                                                                                           |            |
|-------------------------|-------------------|-----------------------------------------------------|---------------|---------------------------------------------------------------------------------------------------------------------------|------------|
|                         |                   | CCAAT/enhancer binding protein (C/EBP)              |               | differentiation, leading to overactivation of immune system and impaired immune response                                  |            |
| HIV-1<br>(Retroviruses) | miR132            | Cellular transcriptional regulatory protein (MeCP2) | Upregulated   | Downregulates expression of MeCP2, leading not only to promotion of viral replication, but also reactivation in monocytes | [224]      |
|                         | miR221 and miR222 | Receptor on CD4 T cells                             | Downregulated | Important for HIV-1 binding and upregulation of TNF $\alpha$ production, leading to restriction of entry of HIV-1         | [224, 225] |
| H5N1 (Influenza virus)  | miR29c            | NF $\kappa$ B                                       | Downregulated | Decreases the expression of NF $\kappa$ B pathway and inhibits host inflammatory response                                 | [244]      |
|                         | miR141            | TGF $\beta$ 2                                       | Upregulated   | Not fully understood. Presumed that it causes low host inflammatory response                                              | [243, 244] |

**Table S11.** Viral miRNAs in RNA virus infection.

| Virus                   | miRNA      | Target                                                                | Regulation of target expression | Role                                                                                                                  | References      |
|-------------------------|------------|-----------------------------------------------------------------------|---------------------------------|-----------------------------------------------------------------------------------------------------------------------|-----------------|
| HIV-1<br>(Retroviruses) | rv-miRN367 | Suppressor factor gene Nef                                            | Unknown                         | Leading to persistence of viral infection and survival of infected cells                                              | [224, 226, 245] |
|                         | rv-miRH1   | Apoptosis antagonizing transcription factor gene (AATF) and miRNA-140 | Unknown                         | Inhibition and suppression of its targets leads to apoptosis inhibition and overexpression of viral accessory protein | [245]           |
| H5N1 (Influenza virus)  | miRHA-3p   | Poly(rC)-binding protein 2 (PCBP2)                                    | Upregulated                     | Downregulation of PCBP2 leads to cytokine storm                                                                       | [226, 245]      |
